# Supplementary material
Source: publisher figshare collection journal article supplement (https://geolsoc.figshare.com/ndownloader/files/24737230)
Supplement: Supplementary file 1 [file 24737230]

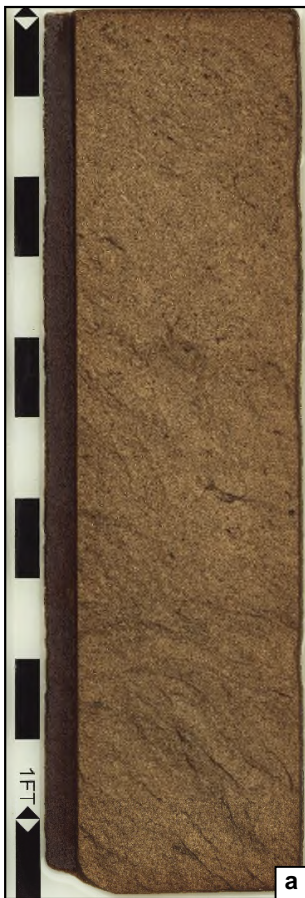

Bioturbated sandstone

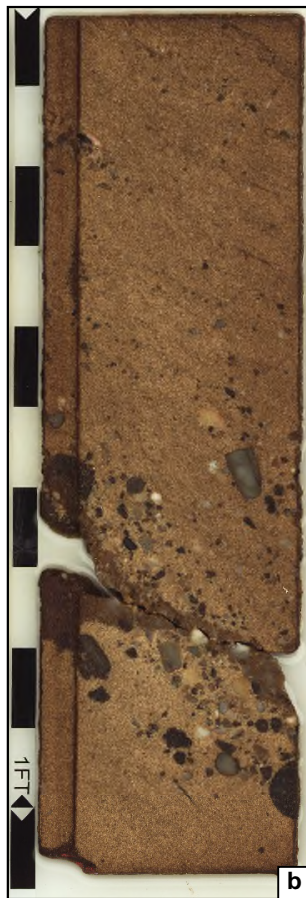

Transgressive lag

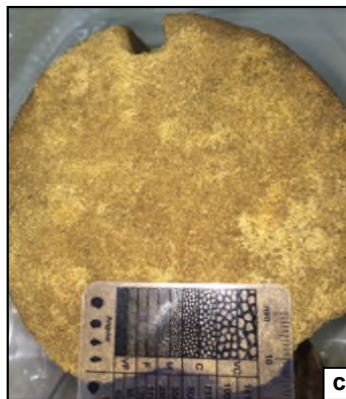

Massive structureless sandstone

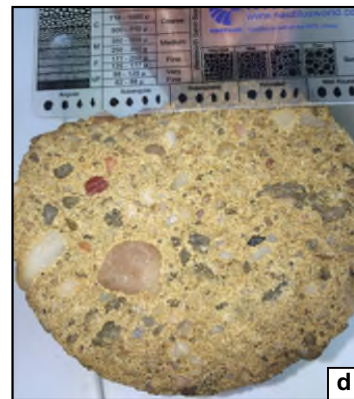

Transgressive lag

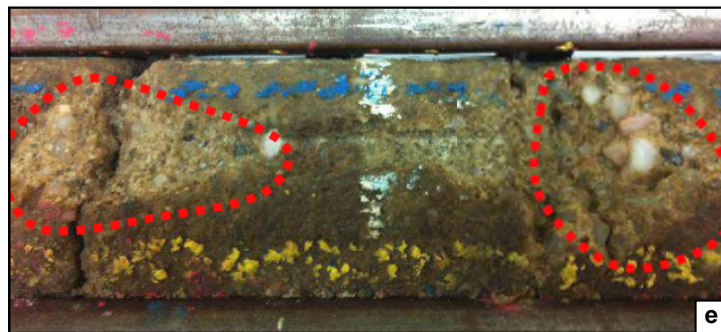

Weak zones

**Supplementary material 1.** Core photos from the 15/20a-19 well showing the transgressive lag and massive structureless sandstone (**a - d**). Zones of weakness are evident around the pebbly sandstone (**e**) on the images following the scratch test for geomechanical testing.
